# Supplementary material
Source: PubMed Central journal article supplement (PMC5115451)
Supplement: ADVS-3-0h-s001.pdf [file ADVS-3-0h-s001.pdf]

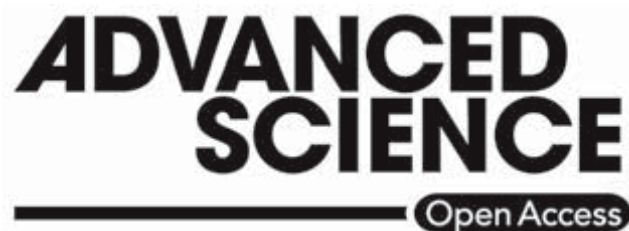

## Supporting Information

for *Adv. Sci.*, DOI: 10.1002/advs.201500269

**Significant Stability Enhancement in High-Efficiency  
Polymer:Fullerene Bulk Heterojunction Solar Cells by  
Blocking Ultraviolet Photons from Solar Light**

*Jaehoon Jeong, Jooyeok Seo, Sungho Nam, Hyemi Han,  
Hwajeong Kim,\* Thomas D. Anthopoulos, Donal D. C.  
Bradley, and Youngkyoo Kim\**

((Supporting Information can be included here using this template))

Copyright WILEY-VCH Verlag GmbH & Co. KGaA, 69469 Weinheim, Germany, 2013.

## Supporting Information

### **Significant stability enhancement in high efficiency polymer:fullerene bulk heterojunction solar cells by blocking ultraviolet photons from solar light**

*Jaehoon Jeong,<sup>a,#</sup> Jooyeok Seo,<sup>a,#</sup> Sungho Nam,<sup>a,b,#</sup> Hyemi Han,<sup>a</sup> Hwajeong Kim,<sup>a,c\*</sup> Thomas D. Anthopoulos,<sup>b</sup> Donal D. C. Bradley,<sup>b</sup> and Youngkyoo Kim<sup>a,\*</sup>*

<sup>a</sup> Organic Nanoelectronics Laboratory, Department of Chemical Engineering, Kyungpook National University, Daegu 702-701, Republic of Korea

<sup>b</sup> Center for Plastic Electronics, Department of Physics, Blackett Laboratory, Imperial College London, London SW7 2AZ, United Kingdom

<sup>c</sup> Priority Research Center, Research Institute of Advanced Energy Technology, Kyungpook National University, Daegu 702-701, Republic of Korea

\*E-mail: [ykimm@knu.ac.kr](mailto:ykimm@knu.ac.kr)

<sup>#</sup>Equal Contribution: J.J., J.S., and S.N. contributed equally to this work.

**Table S1.** Summary of solar cell performances for glass/ITO/ZnO/PTB7-Th:PC<sub>71</sub>BM/MoO<sub>3</sub>/Ag solar cells without (a) and with (b) UV-cut filter (UCF).

|                                          | w/o UCF<br>(under 100 mW/cm <sup>2</sup> ) |        |         | w/ UCF<br>(under 100 mW/cm <sup>2</sup> ) |        |         | w/o UCF<br>(under 80 mW/cm <sup>2</sup> ) |        |         |
|------------------------------------------|--------------------------------------------|--------|---------|-------------------------------------------|--------|---------|-------------------------------------------|--------|---------|
|                                          | 0 min                                      | 60 min | 120 min | 0 min                                     | 60 min | 120 min | 0 min                                     | 60 min | 120 min |
| J <sub>SC</sub><br>(mA/cm <sup>2</sup> ) | 17.29                                      | 14.39  | 11.89   | 14.85                                     | 14.69  | 14.41   | 14.01                                     | 13.07  | 12.84   |
| V <sub>OC</sub><br>(V)                   | 0.78                                       | 0.66   | 0.61    | 0.77                                      | 0.75   | 0.75    | 0.76                                      | 0.71   | 0.70    |
| FF<br>(%)                                | 65.7                                       | 45.4   | 42.2    | 64.0                                      | 61.5   | 60.4    | 69.0                                      | 56.5   | 53.5    |
| PCE<br>(%)                               | 8.87                                       | 4.31   | 3.06    | 7.33                                      | 6.77   | 6.53    | 7.35                                      | 5.25   | 4.81    |
| R <sub>S</sub><br>(Ω·cm <sup>2</sup> )   | 80                                         | 150    | 180     | 90                                        | 90     | 90      | 80                                        | 120    | 130     |
| R <sub>SH</sub><br>(kΩ·cm <sup>2</sup> ) | 12.9                                       | 2.2    | 2.7     | 6.8                                       | 8.3    | 6.6     | 28.4                                      | 4.5    | 9.4     |

**Table S2.** Summary of solar cell performances for glass/ITO/ZnO/PEI/PTB7-Th:PC<sub>71</sub>BM/MoO<sub>3</sub>/Ag solar cells without (a) and with (b) UV-cut filter (UCF).

|                                          | w/o UCF<br>(under 100 mW/cm <sup>2</sup> ) |       |       |      | w/ UCF<br>(under 100 mW/cm <sup>2</sup> ) |       |       |       |       |       |
|------------------------------------------|--------------------------------------------|-------|-------|------|-------------------------------------------|-------|-------|-------|-------|-------|
|                                          | 0 h                                        | 1 h   | 5 h   | 14 h | 0 h                                       | 2 h   | 6 h   | 10 h  | 14 h  | 21 h  |
| J <sub>SC</sub><br>(mA/cm <sup>2</sup> ) | 17.40                                      | 13.95 | 10.95 | 8.09 | 15.81                                     | 15.78 | 15.39 | 15.01 | 14.87 | 14.79 |
| V <sub>OC</sub><br>(V)                   | 0.78                                       | 0.61  | 0.59  | 0.57 | 0.77                                      | 0.74  | 0.74  | 0.74  | 0.74  | 0.74  |
| FF<br>(%)                                | 65.7                                       | 46.0  | 41.2  | 40.0 | 61.8                                      | 61.6  | 58.9  | 60.4  | 61.6  | 60.8  |
| PCE<br>(%)                               | 8.91                                       | 3.91  | 2.66  | 1.84 | 7.53                                      | 7.19  | 6.71  | 6.71  | 6.78  | 6.65  |
| R <sub>S</sub><br>(Ω·cm <sup>2</sup> )   | 80                                         | 150   | 210   | 370  | 150                                       | 120   | 140   | 110   | 100   | 100   |
| R <sub>SH</sub><br>(kΩ·cm <sup>2</sup> ) | 5.7                                        | 2.2   | 1.8   | 2.6  | 8.4                                       | 4.2   | 11.0  | 5.4   | 5.5   | 7.3   |

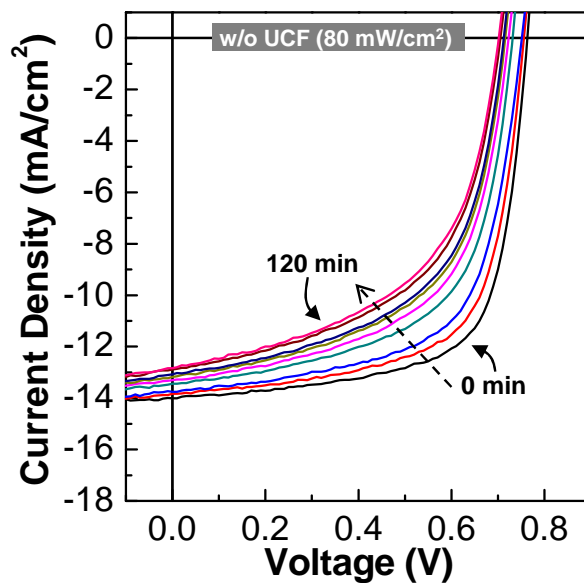

**Figure S1.** Current density – voltage (J-V) curves of glass/ITO/ZnO/PTB7-Th:PC<sub>71</sub>BM/MoO<sub>3</sub>/Ag solar cells under continuous illumination with simulated solar light (air mass 1.5G, 80 mW/cm<sup>2</sup>) for 120 min without UCF.

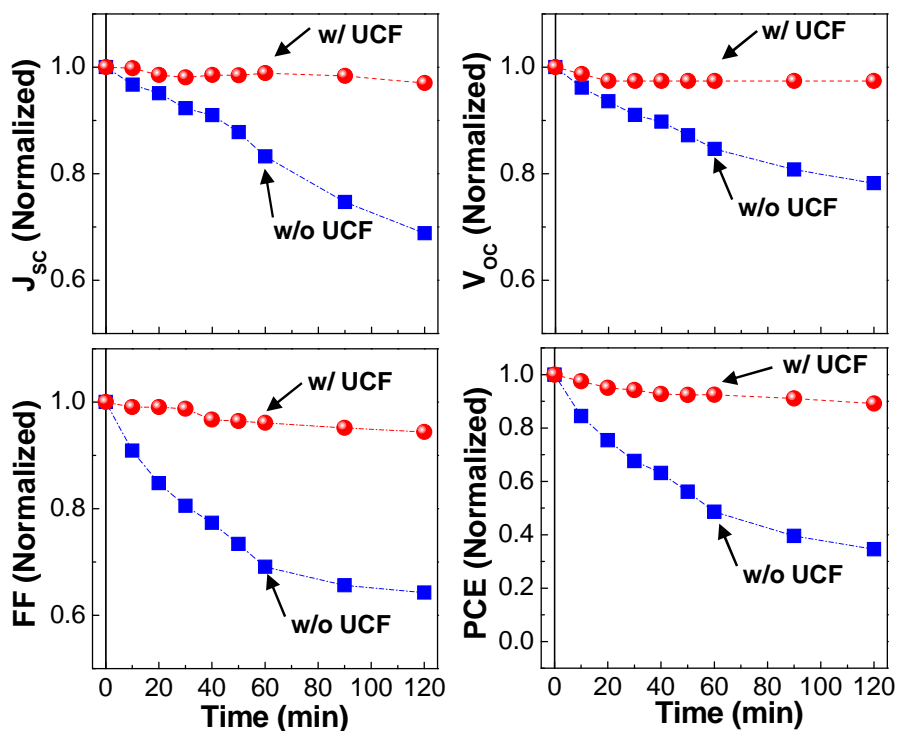

**Figure S2.** Normalized J<sub>sc</sub>, V<sub>oc</sub>, FF, PCE, R<sub>s</sub>, and R<sub>sh</sub> as a function of exposure time under simulated solar light (air mass 1.5G, 100 mW/cm<sup>2</sup>) for glass/ITO/ZnO/PTB7-Th:PC<sub>71</sub>BM/MoO<sub>3</sub>/Ag solar cells with and without UCF (see original values in Figure 3).

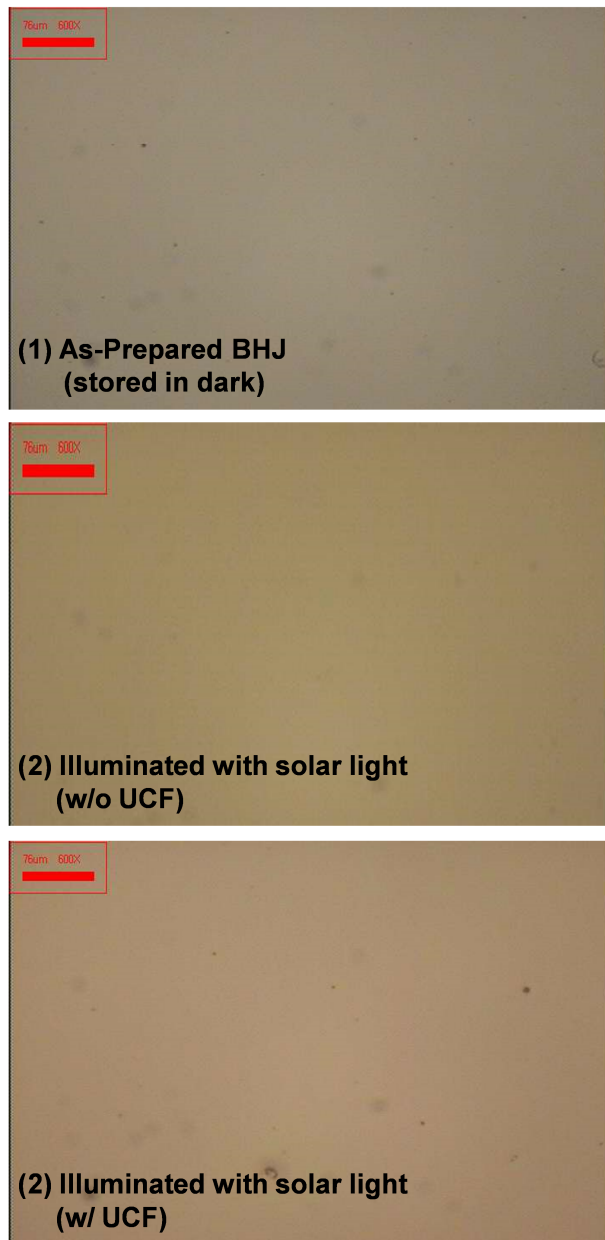

**Figure S3.** Optical microscope images for PTB7-Th:PC<sub>71</sub>BM BHJ films: (1) As-prepared, (2) illuminated with simulated solar light (air mass 1.5G, 100 mW/cm<sup>2</sup>) without UCF for 120 min, and (3) illuminated with simulated solar light (air mass 1.5G, 100 mW/cm<sup>2</sup>) with UCF for 120 min. The size of scale bar in red is 76 μm. Note that some big spots here come from defects in lenses of optical microscope.

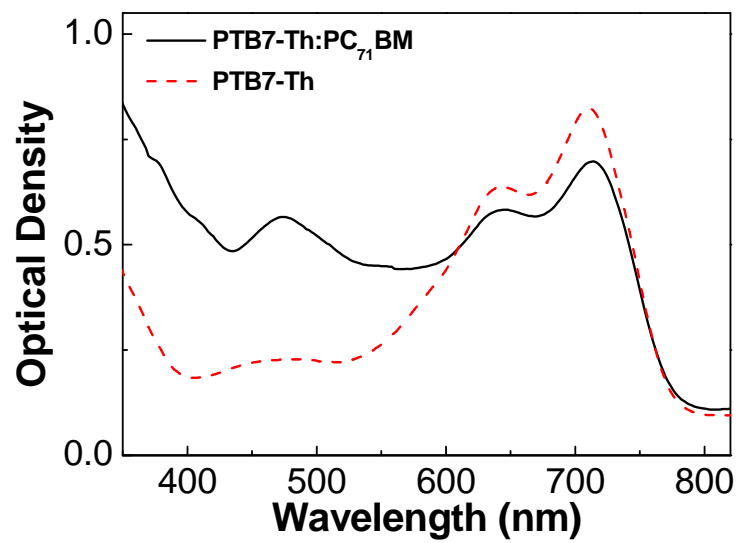

**Figure S4.** Optical absorption spectra of the pristine PTB7-Th film (red dashed line) and the PTB7-Th:PC<sub>71</sub>BM BHJ film (black solid line).

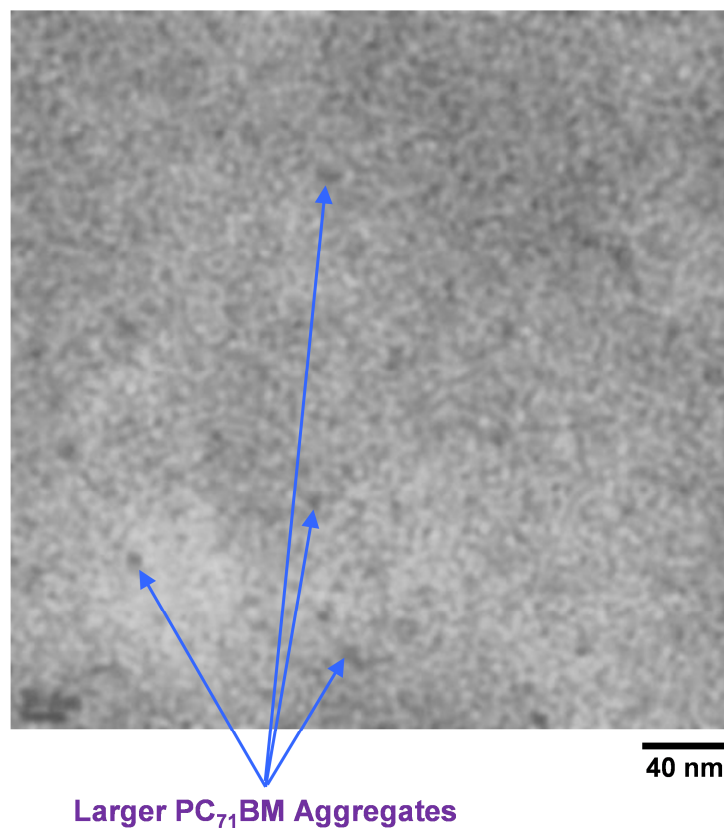

**Figure S5.** Enlarged TEM image (black & white) for the PTB7-Th:PC<sub>71</sub>BM BHJ film illuminated with simulated solar light (air mass 1.5G, 100 mW/cm<sup>2</sup>) without UCF for 120 min. The blue arrows point the large aggregates of PC<sub>71</sub>BM, which are considered to be formed by oxidative degradation of both components (preferably PTB7-Th) in the BHJ film.

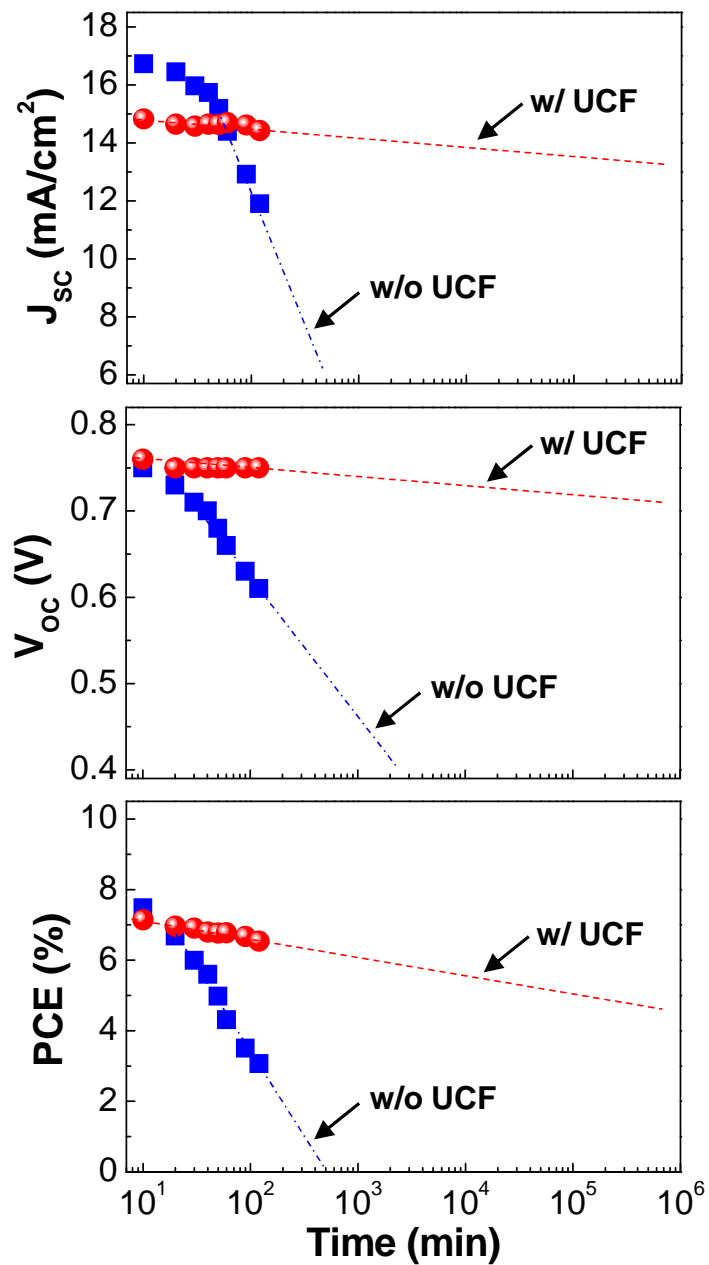

**Figure S6.** Projected  $J_{sc}$ ,  $V_{oc}$ , and PCE as a function of exposure time under simulated solar light (air mass 1.5G,  $100 \text{ mW}/\text{cm}^2$ ) for glass/ITO/ZnO/PTB7-Th:PC<sub>71</sub>BM/MoO<sub>3</sub>/Ag solar cells with and without UCF.

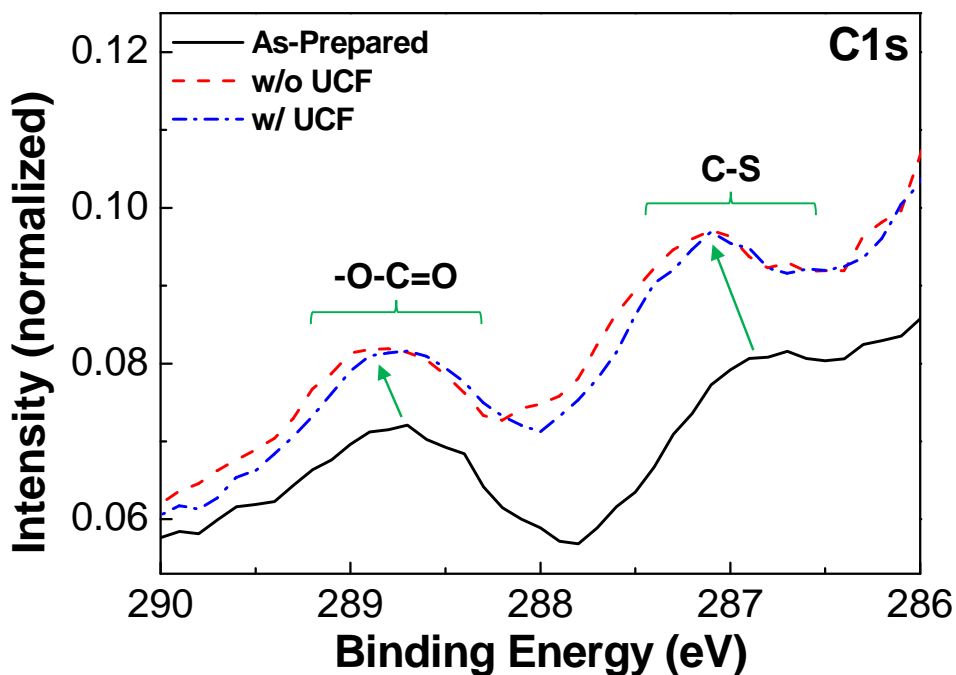

**Figure S7.** Enlarged C1s XPS spectra for  $\text{-O-C=O}$  and C-S groups in the PTB7-Th:PC<sub>71</sub>BM BHJ films: (1) As-prepared (black solid line), (2) illuminated with simulated solar light (air mass 1.5G, 100 mW/cm<sup>2</sup>) without UCF for 120 min (red dashed line), and (3) illuminated with simulated solar light (air mass 1.5G, 100 mW/cm<sup>2</sup>) with UCF for 120 min (blue dash-dot line). Green arrows denote the shift of C1s peaks in the as-coated film (1) after illumination, indicating the environmental change of carbon atoms in the  $\text{-O-C=O}$  and C-S groups of the BHJ films after illumination.



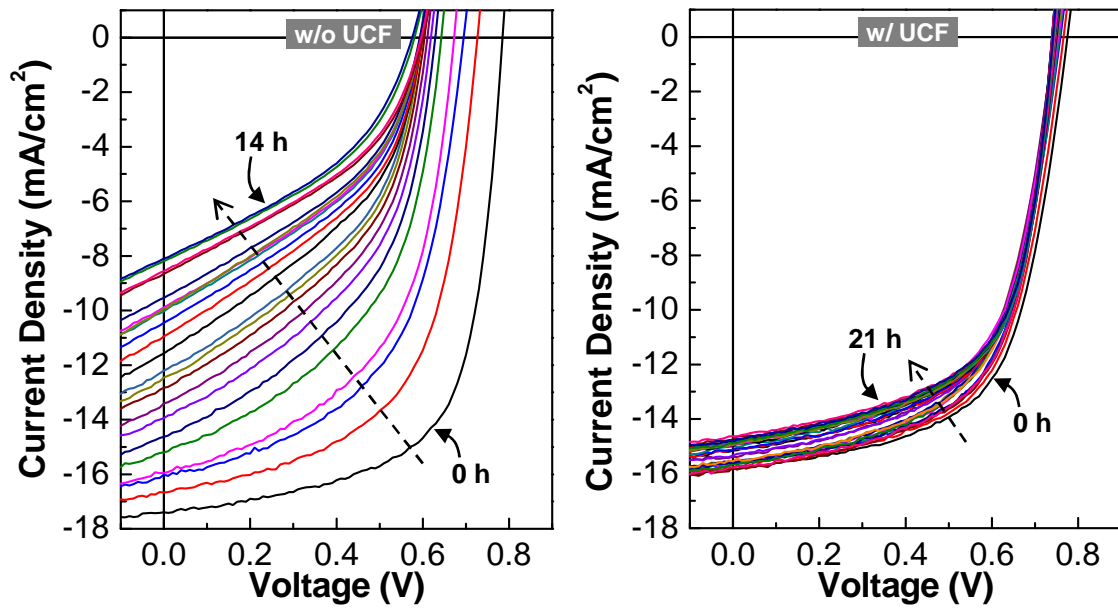

**Figure S8.** Current density – voltage (J-V) curves of glass/ITO/ZnO/PTB7-Th:PC<sub>71</sub>BM/MoO<sub>3</sub>/Ag solar cells under continuous illumination with simulated solar light (air mass 1.5G, 100 mW/cm<sup>2</sup>): (left) without UCF for 14 h and (right) with UCF for 21 h. Note that the sorted J-V curves appear in Figure 7.
